# Supplementary material
Source: PubMed Central journal article supplement (PMC8423903)
Supplement: mmc1.pdf [file mmc1.pdf]

**Cell Reports, Volume 36**

**Supplemental information**

**A molecular sensor determines  
the ubiquitin substrate specificity  
of SARS-CoV-2 papain-like protease**

**Stephanie Patchett, Zongyang Lv, Wioletta Rut, Miklos Békés, Marcin Drag, Shaun K. Olsen, and Tony T. Huang**

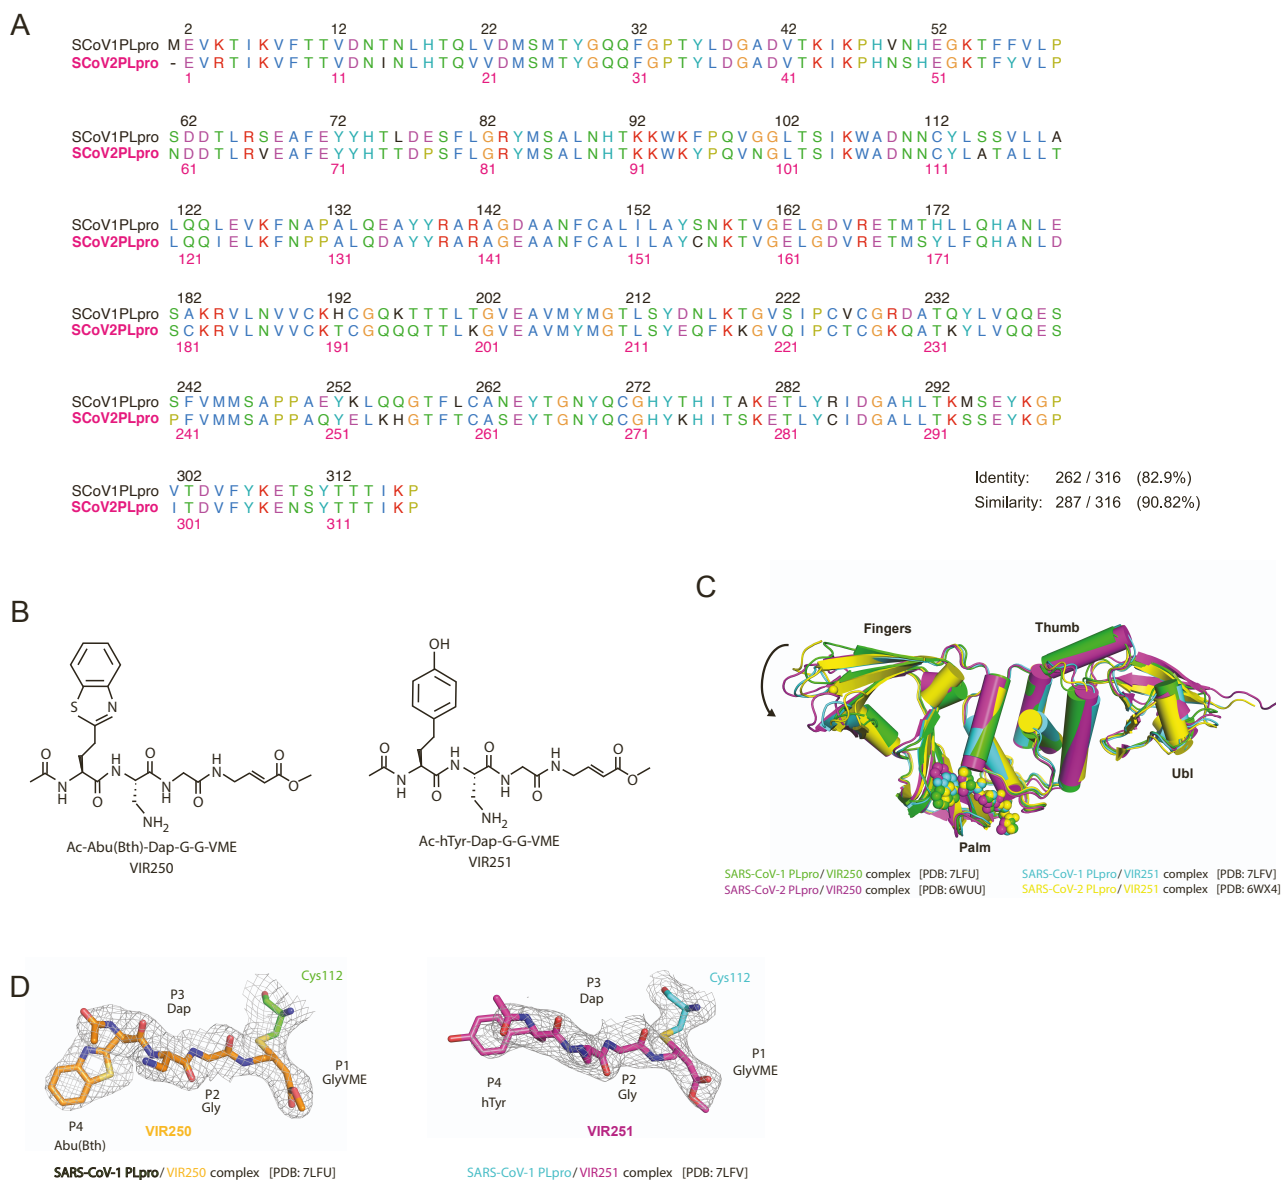

**Figure S1. PLpro alignments and inhibitor schematics, Related to Figure 1.** **A)** Schematic of VIR250 and VIR251 inhibitors. **B)** Crystal structures of SCoV-1 and SCoV-2 PLpro with VIR250 and VIR251 aligned. VIR250 and VIR251 shown as spheres, arrow highlights slight rotation of the fingers domain. **C)** Sequence alignment of PLpro domain from SARS-CoV-1 and SARS-CoV-2, aligned using Local alignment (Smith-Waterman). SCoV-1 PLpro amino acid numbering is shown above the alignment (black) and SCoV-2 numbering is shown below the alignment (magenta). **D)** 2FoFc electron density maps of VIR250 (left) and VIR251 (right) contoured at  $1.0\sigma$  and shown as mesh.

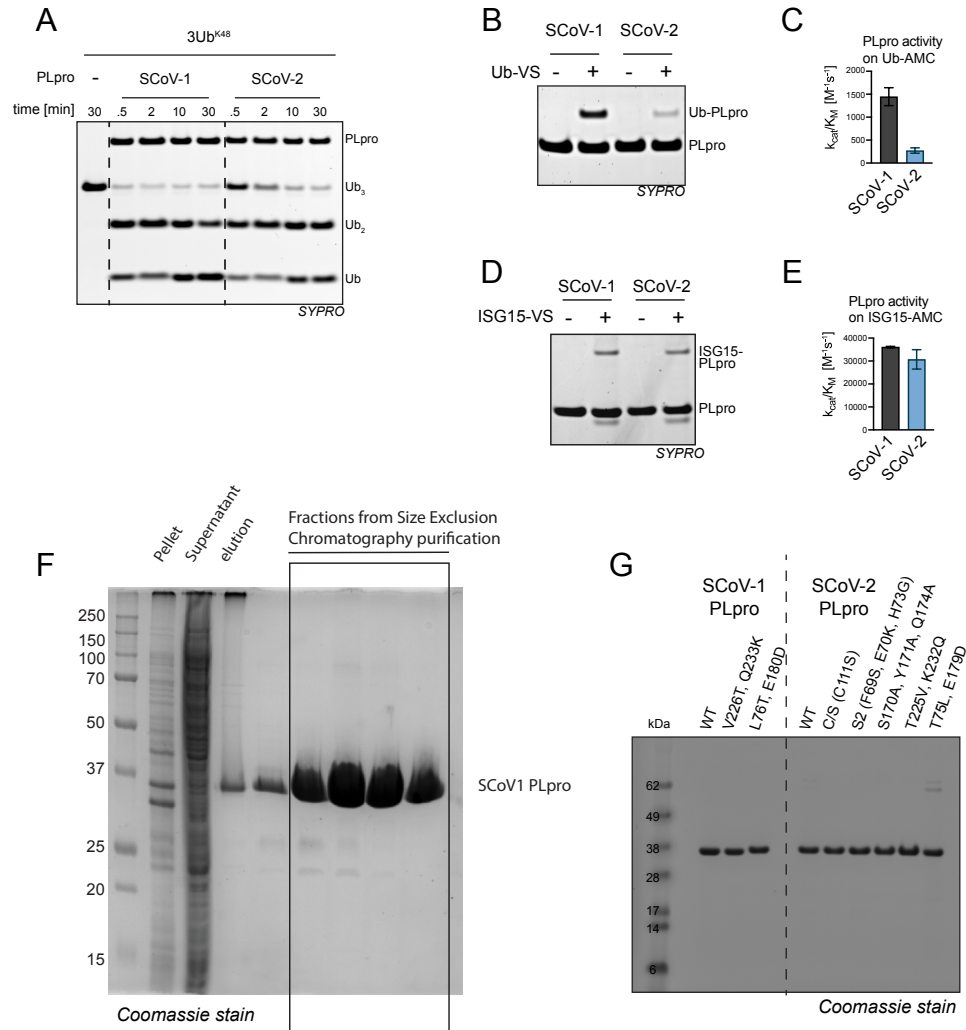

**Figure S2. Comparison of SCoV-1 and SCoV-2 PLpro activity, Related to Figures 2, 3 and STAR Methods.** **A)** Cleavage of K48-linked tetra-Ub chains (3UbK48) by SARS-CoV-1 vs. SARS-CoV-2 PLpro. **B)** Ub-Vinyl Sulfone (Ub-VS) labeling of SARS-CoV-1 vs. SARS-CoV-2 PLpro. **C)** Relative apparent  $k_{cat}/K_M$  values for hydrolysis of Ub-AMC by SARS-CoV-1 and SARS-CoV-2 PLpro. **D)** ISG15-VS labeling of SARS-CoV-1 vs. SARS-CoV-2 PLpro. Experiments in **A**, **B**, **D** were repeated at least three times with similar results. **E)** Relative apparent  $k_{cat}/K_M$  values for hydrolysis of ISG15-AMC by SARS-CoV-1 and SARS-CoV-2 PLpro. Error bars in **C**, **E** represent SD ( $n = 3$  independent experiments). **F)** Last step of SCoV-1 PLpro purification on size exclusion chromatography, analyzed by SDS-PAGE and Coomassie staining. The pure fractions were pooled and concentrated. **G)** Purified SCoV-1 and SCoV-2 PLpro and mutants (2  $\mu$ M) analyzed by SDS-PAGE and Coomassie staining.

**Table S1. Crystallographic Data and Refinement Statistics, Related to Figure 1.**

|                                                        | SARS-CoV-1<br>PLpro/VIR250 complex                            | SARS-CoV-1<br>PLpro/VIR251 complex                             |
|--------------------------------------------------------|---------------------------------------------------------------|----------------------------------------------------------------|
| PDB ID                                                 | 7LFU                                                          | 7LFV                                                           |
| Source                                                 | APS 24 IDE                                                    | APS 24 IDE                                                     |
| Wavelength (Å)                                         | 1.00                                                          | 1.00                                                           |
| Resolution Limits (Å)                                  | 70.7-2.29 (2.37-2.29)                                         | 132.7-2.23 (2.30-2.23)                                         |
| Space Group                                            | I222                                                          | P6 <sub>1</sub> 22                                             |
| Unit Cell (Å) <i>a</i> , <i>b</i> , <i>c</i>           | 70.8, 90.4, 113.6                                             | 103.6, 103.6, 265.4                                            |
| Unit Cell (°) $\alpha$ , $\beta$ , $\gamma$            | 90, 90, 90                                                    | 90, 90, 120                                                    |
| Number of observations                                 | 108176                                                        | 1632487                                                        |
| Number of reflections                                  | 16767 (1626)                                                  | 42208 (3796)                                                   |
| Completeness (%)                                       | 100 (100)                                                     | 99.9 (99.3)                                                    |
| Mean <i>I</i> / $\sigma$                               | 16.0 (0.7)                                                    | 30.9 (2.0)                                                     |
| CC <sub>1/2</sub>                                      | 0.9986 (0.408)                                                | 1.00 (0.756)                                                   |
| R <sub>merge</sub> <sup>a</sup>                        | 0.074 (2.15)                                                  | 0.099 (2.04)                                                   |
| R <sub>pim</sub>                                       | 0.032 (0.962)                                                 | 0.016 (0.341)                                                  |
| <b>Refinement Statistics</b>                           |                                                               |                                                                |
| Resolution Limits (Å)                                  | 70.7-2.29 (2.36-2.29)                                         | 53.3-2.23 (2.28-2.23)                                          |
| # of reflections (work/free)                           | 16663 (1668)                                                  | 42096 (2000)                                                   |
| Completeness (%)                                       | 99.3 (93.0)                                                   | 99.9 (99.0)                                                    |
| Protein/solvent/ligand atoms                           | 2414/0/36                                                     | 5009/156/35                                                    |
| R <sub>cryst</sub> <sup>b</sup>                        | 0.224 (0.360)                                                 | 0.197 (0.297)                                                  |
| R <sub>free</sub>                                      | 0.265 (0.380)                                                 | 0.235 (0.352)                                                  |
| Bonds (Å)/ Angles (°)                                  | 0.003/0.499                                                   | 0.009/1.078                                                    |
| B-factors:<br>protein/solvent/ligand (Å <sup>2</sup> ) | 91.5/--/84.2                                                  | 64.8/62.9/79.4                                                 |
| Ramachandran plot statistics (%)                       |                                                               |                                                                |
| favored                                                | 96.3                                                          | 96.8                                                           |
| allowed                                                | 3.7                                                           | 3.2                                                            |
| outliers                                               | 0                                                             | 0                                                              |
| MolProbity score                                       | 1.81- 96 <sup>th</sup> percentile<br>(N=8848, 2.29 Å ± 0.25Å) | 1.64- 97 <sup>th</sup> percentile<br>(N=10112, 2.23 Å ± 0.25Å) |

Parentheses indicate statistics for the high-resolution data bin for x-ray data.

a.  $R_{merge} = \frac{\sum hkl \sum i |I(hkl)_i - \langle I(hkl) \rangle|}{\sum hkl \sum i \langle I(hkl)_i \rangle}$ .

b.  $R_{cryst} = \frac{\sum hkl |F_o(hkl) - F_c(hkl)|}{\sum hkl |F_o(hkl)|}$ , where *F<sub>o</sub>* and *F<sub>c</sub>* are observed and calculated structure factors, respectively.
